# Supplementary material for: MYB transcription factor family in sweet cherry (Prunus avium L.): genome-wide investigation, evolution, structure, characterization and expression patterns
Source: PubMed Central journal article supplement (PMC8722155; doi:10.1186/s12870-021-03374-y), 2022-01-03

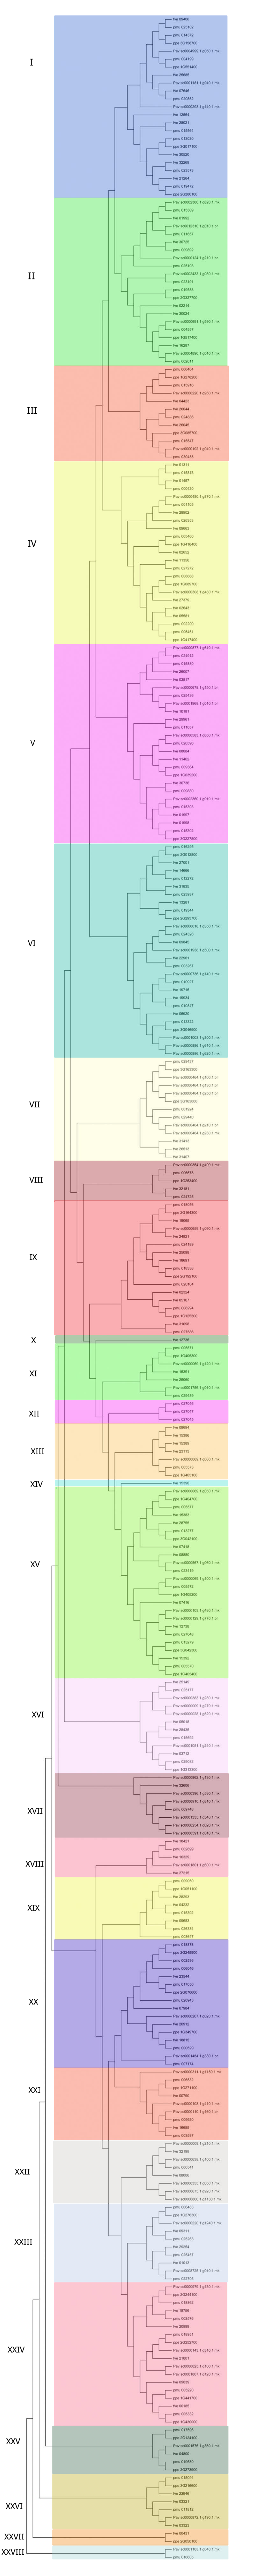

Supplement: 12870_2021_3374_MOESM3_ESM.pdf [file 12870_2021_3374_MOESM3_ESM.pdf]
